# Supplementary material for: HDAC inhibitor conjugated polymeric prodrug micelles for doxorubicin delivery
Source: Royal Society of Chemistry journal article supplement (doi:10.1039/c6tb03038f), 2017-01-01
Supplement: c6tb03038f1.pdf [file c6tb03038f1.pdf]

**Electronic Supplementary Information**

**HDAC Inhibitor Conjugated Polymeric Prodrug Micelles for  
Doxorubicin Delivery**

*Suchithra A. Senevirathne,<sup>a</sup> Katherine E. Washington,<sup>a</sup> Jason B. Miller,<sup>b</sup> Michael C.*

*Biewer,<sup>a</sup> David Oupicky,<sup>c</sup> Daniel J. Siegwart<sup>\*b</sup> and Mihaela C. Stefan<sup>\*a</sup>*

<sup>a</sup>Department of Chemistry, University of Texas at Dallas, Richardson, TX, USA.

\*Email: [mihaela@utdallas.edu](mailto:mihaela@utdallas.edu).

<sup>b</sup>Simmons Comprehensive Cancer Center, Department of Biochemistry, University of  
Texas Southwestern Medical Center, Dallas, TX, USA.

\*E-mail: [daniel.siegwart@utsouthwestern.edu](mailto:daniel.siegwart@utsouthwestern.edu)

<sup>c</sup>Center for Drug Delivery and Nanomedicine, Department of Pharmaceutical  
Sciences, University of Nebraska Medical Center, Omaha, USA

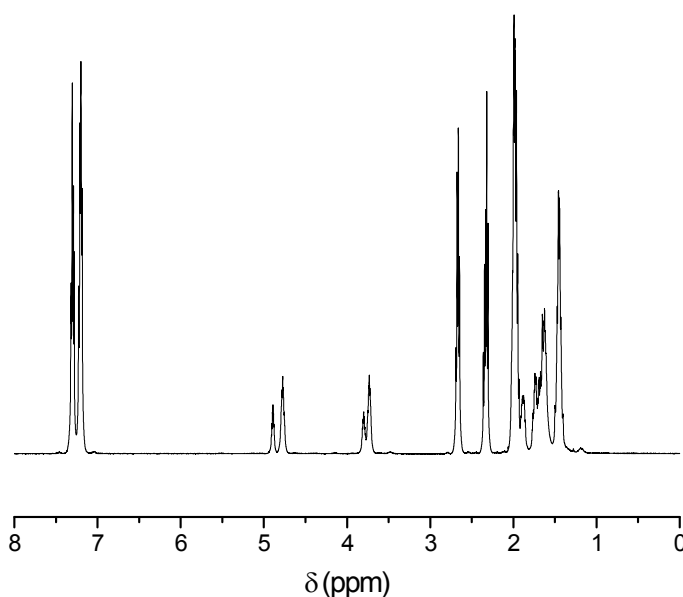

**Figure S1.** <sup>1</sup>H NMR of 4-hydroxycyclohexyl-4-phenylbutanoate

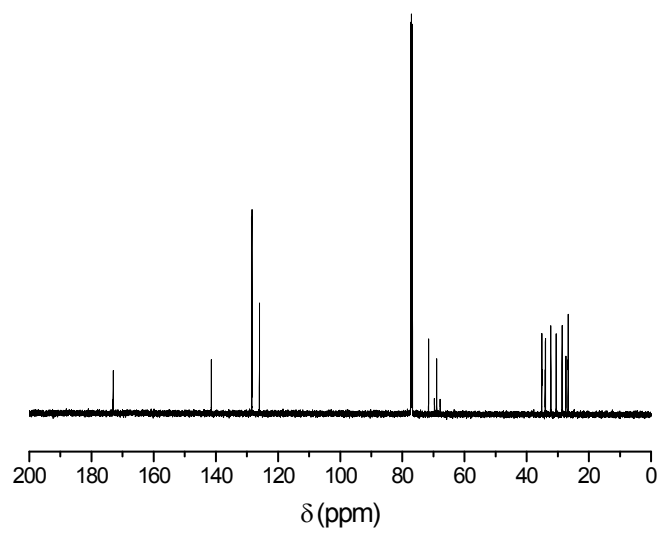

**Figure S2.**  $^{13}\text{C}$  NMR of 4-hydroxycyclohexyl-4-phenylbutanoate

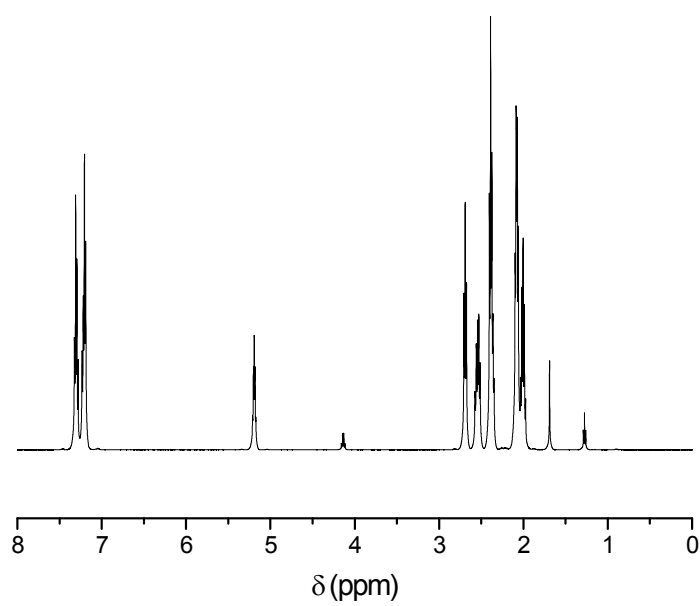

**Figure S3.**  $^1\text{H}$  NMR of 4-oxocyclohexyl-4-phenylbutanoate

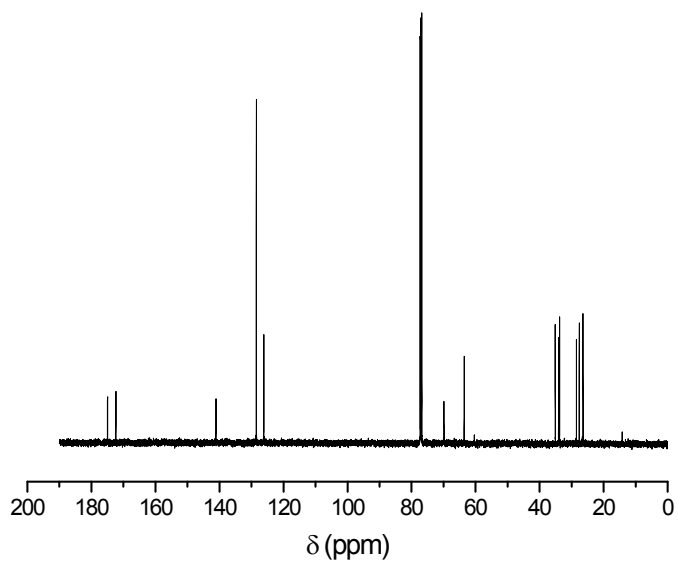

**Figure S4.**  $^{13}\text{C}$  NMR of 4-oxocyclohexyl-4-phenylbutanoate

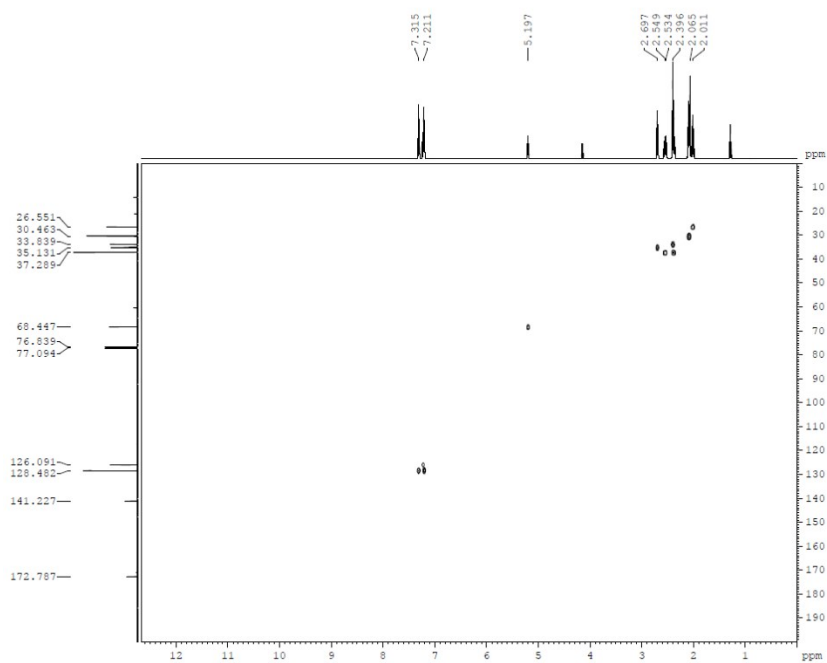

**Figure S5.** HSQC of 4-oxocyclohexyl-4-phenylbutanoate

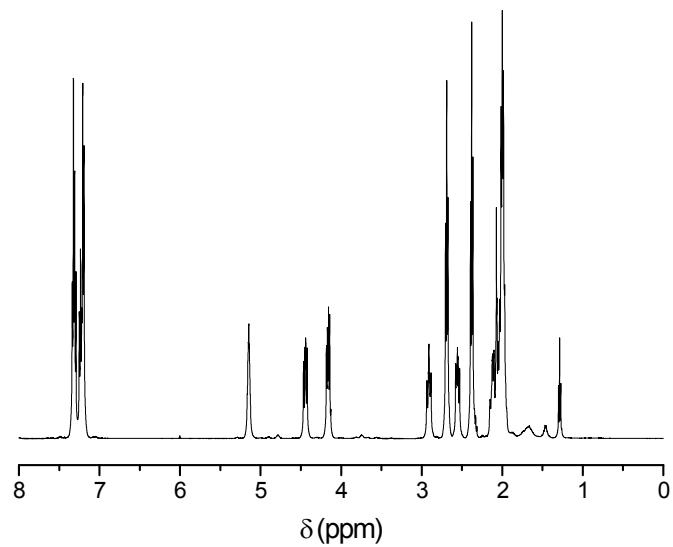

**Figure S6.** <sup>1</sup>H NMR of  $\gamma$ -Phenylbutyrate- $\epsilon$ -Caprolactone

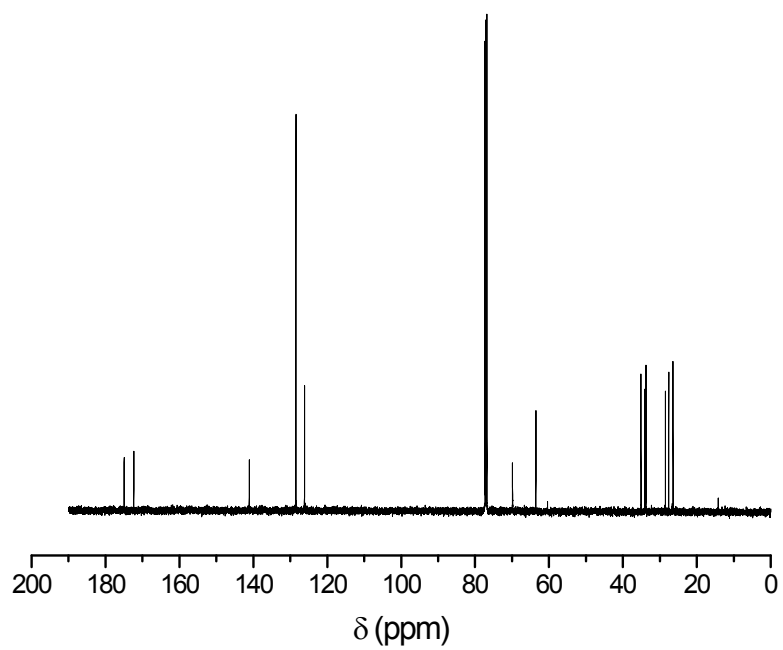

**Figure S7.** <sup>13</sup>C NMR of  $\gamma$ -Phenylbutyrate- $\epsilon$ -Caprolactone

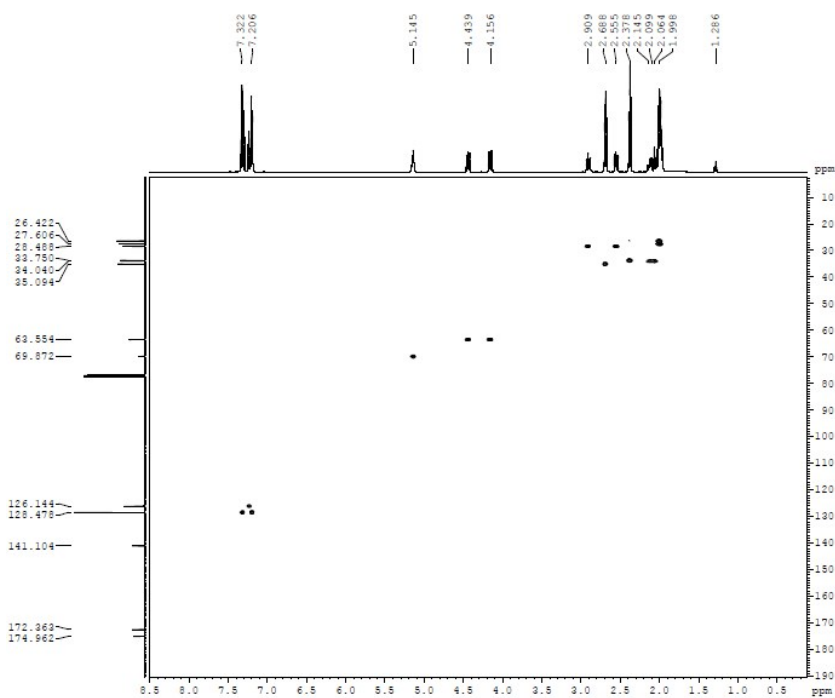

**Figure S8.** HSQC of  $\gamma$ -Phenylbutyrate- $\epsilon$ -Caprolactone

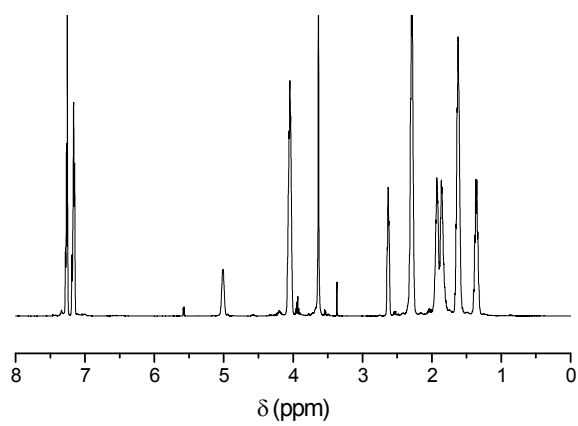

**Figure S9.**  $^1\text{H}$  NMR of P1

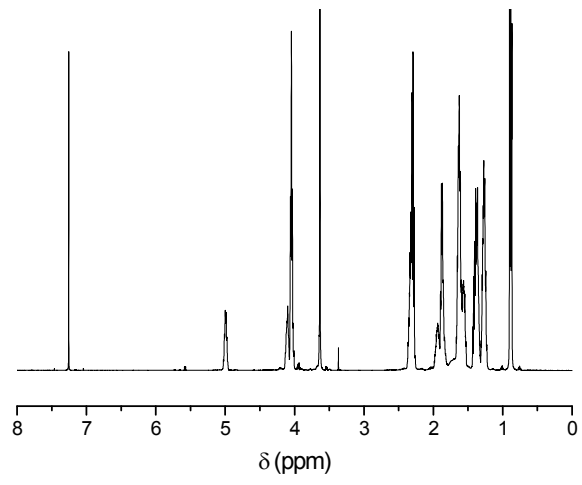

**Figure S10.**  $^1\text{H}$  NMR of P2
